# Supplementary material
Source: ML conference proceedings conference paper supplement (https://openreview.net/forum?id=YK9G4Htdew)
Supplement: supplementary_material [file attachment]

Table 11: Agent scores and human-normalized metrics on the 26 games of the Atari 100k benchmark. We show average scores over 5 seeds. Bold numbers indicate best performing method for each game.

| Game              | Random | Human | SimPLe | DreamerPro | TWM          | IRIS        | DreamerV3    | STORM        | $\Delta$ -IRIS | TWISTER (ours) |
|-------------------|--------|-------|--------|------------|--------------|-------------|--------------|--------------|----------------|----------------|
| Alien             | 228    | 7128  | 617    | 635        | 675          | 420         | 959          | <b>984</b>   | 391            | 970            |
| Amidar            | 6      | 1720  | 74     | 85         | 122          | 143         | 139          | <b>205</b>   | 64             | 184            |
| Assault           | 222    | 742   | 527    | 374        | 683          | <b>1524</b> | 706          | 801          | 1123           | 721            |
| Asterix           | 210    | 8503  | 1128   | 594        | 1116         | 854         | 932          | 1028         | <b>2492</b>    | 1306           |
| Bank Heist        | 14     | 753   | 34     | 217        | 467          | 53          | 649          | 641          | <b>1148</b>    | 942            |
| Battle Zone       | 2360   | 37188 | 4031   | 4200       | 5068         | 13074       | 12250        | <b>13540</b> | 11825          | 9920           |
| Boxing            | 0      | 12    | 8      | 84         | 78           | 70          | 78           | 80           | 70             | <b>88</b>      |
| Breakout          | 2      | 30    | 16     | 14         | 20           | 84          | 31           | 16           | <b>302</b>     | 35             |
| Chopper Command   | 811    | 7388  | 979    | 1564       | 1697         | 1565        | 420          | <b>1888</b>  | 1183           | 910            |
| Crazy Climber     | 10780  | 35829 | 62584  | 53964      | 71820        | 59324       | <b>97190</b> | 66776        | 57854          | 81880          |
| Demon Attack      | 152    | 1971  | 208    | 123        | 350          | <b>2034</b> | 303          | 165          | 533            | 289            |
| Freeway           | 0      | 30    | 17     | 11         | 24           | 31          | 0            | <b>34</b>    | 31             | 32             |
| Frostbite         | 65     | 4335  | 237    | 723        | <b>1476</b>  | 259         | 909          | 1316         | 279            | 305            |
| Gopher            | 258    | 2412  | 597    | 1250       | 1675         | 2236        | 3730         | 8240         | 6445           | <b>22234</b>   |
| Hero              | 1027   | 30826 | 2657   | 4331       | 7254         | 7037        | <b>11161</b> | 11044        | 7049           | 8773           |
| James Bond        | 29     | 303   | 100    | 142        | 362          | 463         | 445          | 509          | 309            | <b>573</b>     |
| Kangaroo          | 52     | 3035  | 51     | 2040       | 1240         | 838         | 4098         | 4208         | 2269           | <b>6016</b>    |
| Krull             | 1598   | 2666  | 2205   | 6989       | 6349         | 6616        | 7782         | 8413         | 5978           | <b>8839</b>    |
| Kung Fu Master    | 258    | 22736 | 14862  | 20650      | 24555        | 21760       | 21420        | <b>26182</b> | 21534          | 23442          |
| Ms Pacman         | 307    | 6952  | 1480   | 1240       | 1588         | 999         | 1327         | <b>2673</b>  | 1067           | 2206           |
| Pong              | -21    | 15    | 13     | 3          | 19           | 15          | 18           | 11           | <b>20</b>      | <b>20</b>      |
| Private Eye       | 25     | 69571 | 35     | 40         | 87           | 100         | 882          | <b>7781</b>  | 103            | 1608           |
| Qbert             | 164    | 13455 | 1289   | 1094       | 3331         | 746         | 3405         | <b>4522</b>  | 1444           | 3197           |
| Road Runner       | 12     | 7845  | 5641   | 9122       | 9107         | 9615        | 15565        | 17564        | 10414          | <b>17832</b>   |
| Seaquest          | 68     | 42055 | 683    | 366        | <b>774</b>   | 661         | 618          | 525          | 827            | 532            |
| Up N Down         | 533    | 11693 | 3350   | 4021       | <b>15982</b> | 3546        | 7600         | 7985         | 4072           | 7068           |
| # Superhuman      | 0      | N/A   | 1      | 4          | 8            | 10          | 9            | 10           | 11             | <b>12</b>      |
| Normed Mean (%)   | 0      | 100   | 33     | 79         | 96           | 105         | 112          | 127          | 139            | <b>162</b>     |
| Normed Median (%) | 0      | 100   | 13     | 28         | 51           | 29          | 49           | 58           | 53             | <b>77</b>      |
