# Supplementary material
Source: ML conference proceedings conference paper supplement (https://openreview.net/forum?id=YK9G4Htdew)

TWISTER

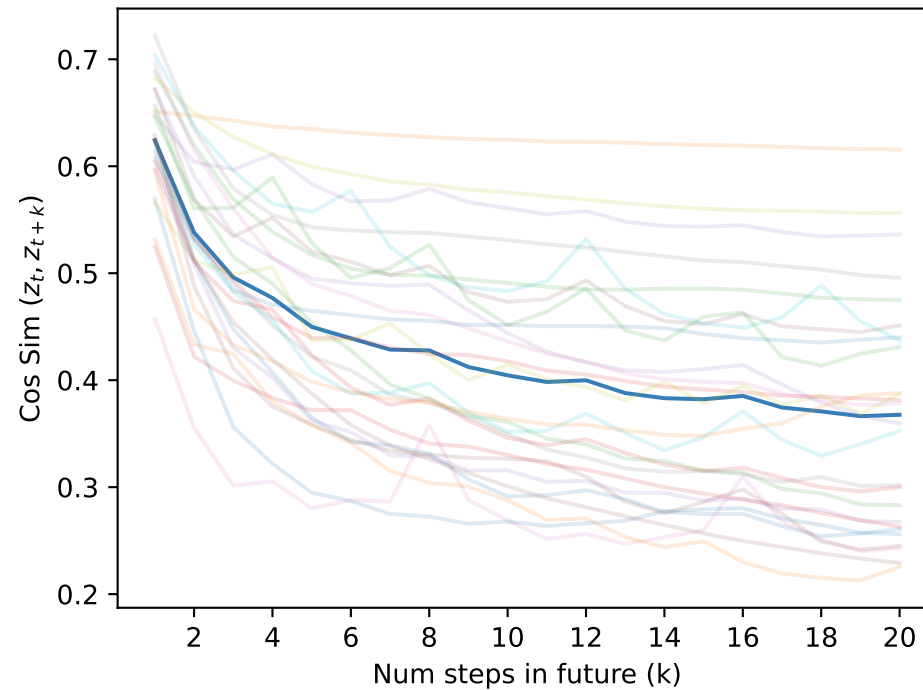

No AC-CPC

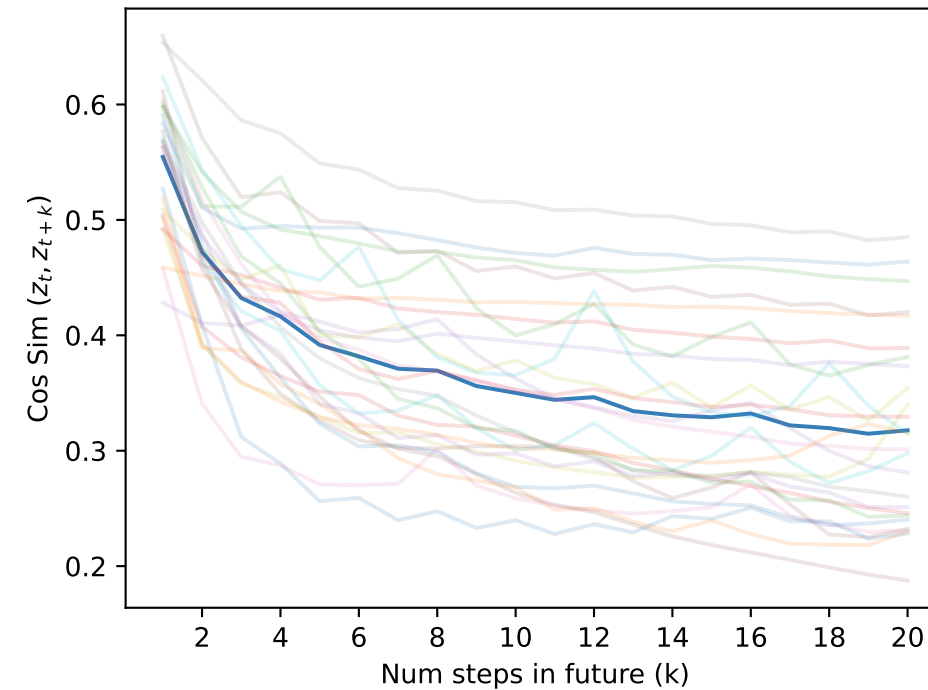

5 Contrastive Steps

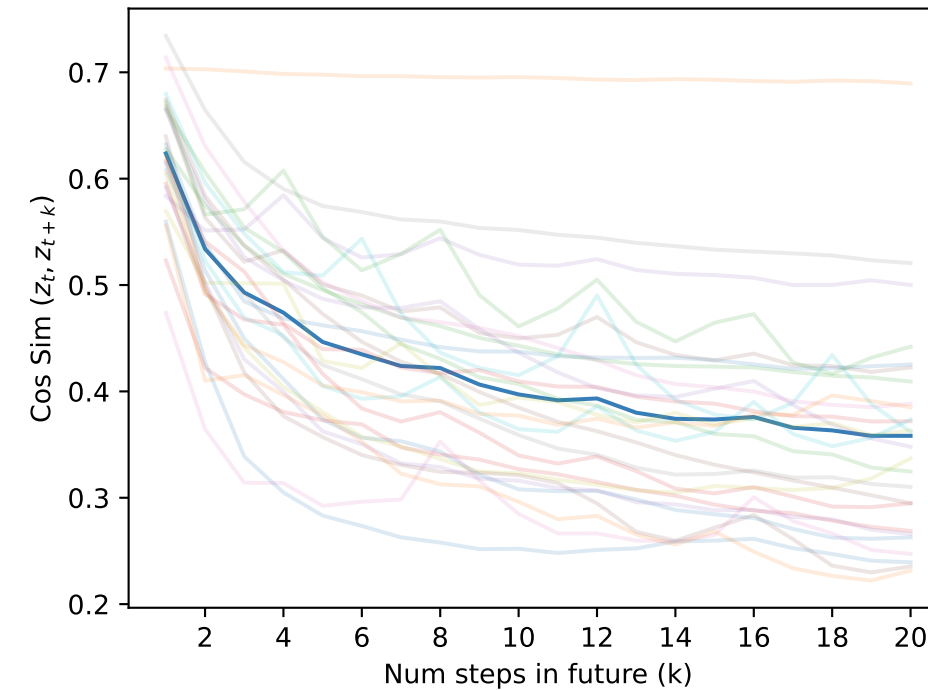

15 Contrastive Steps

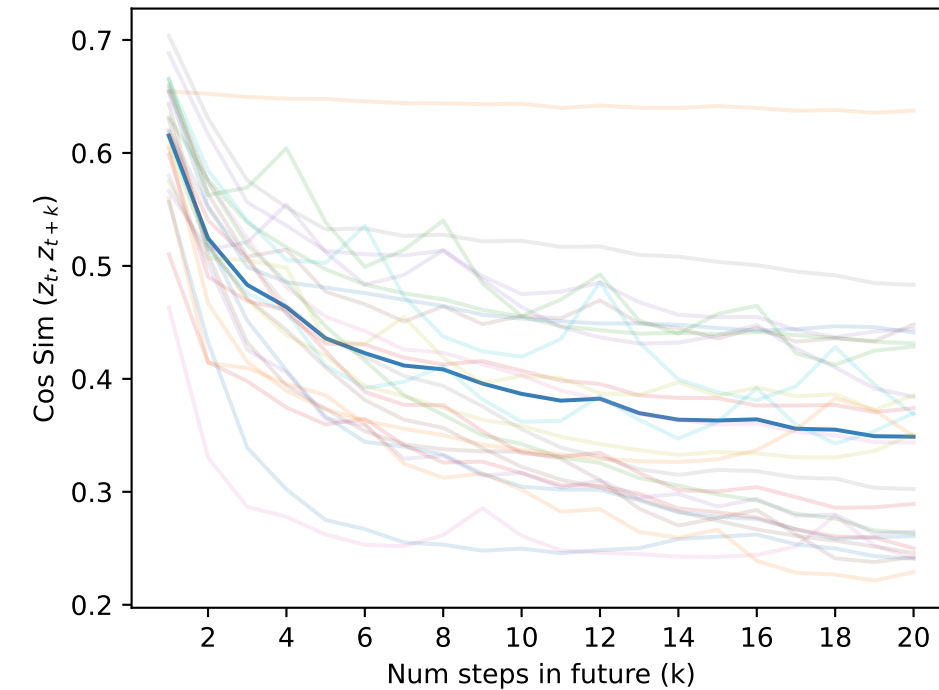

No Action Conditioning

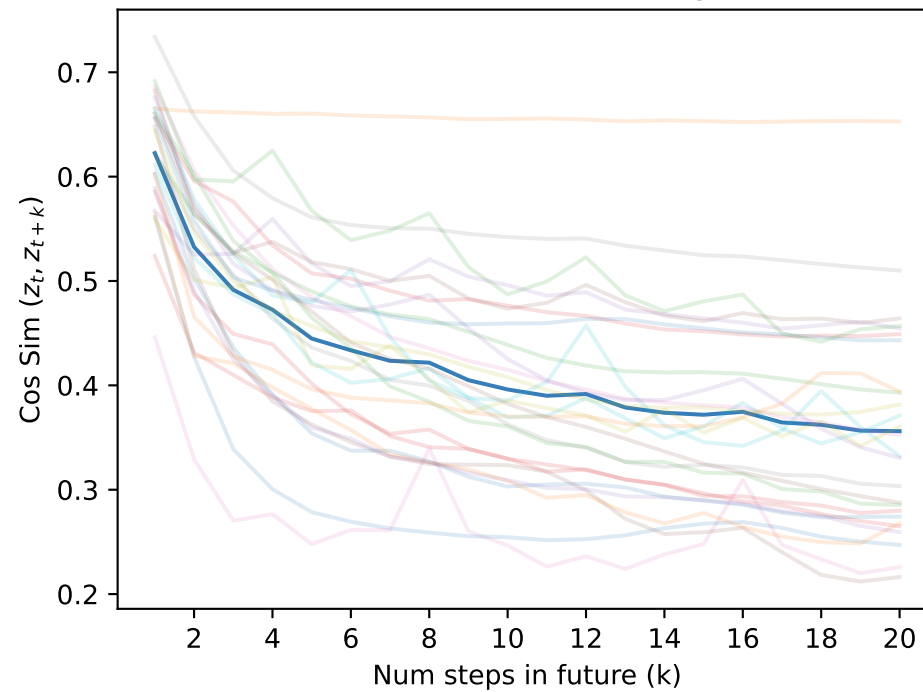

No Data Augmentation

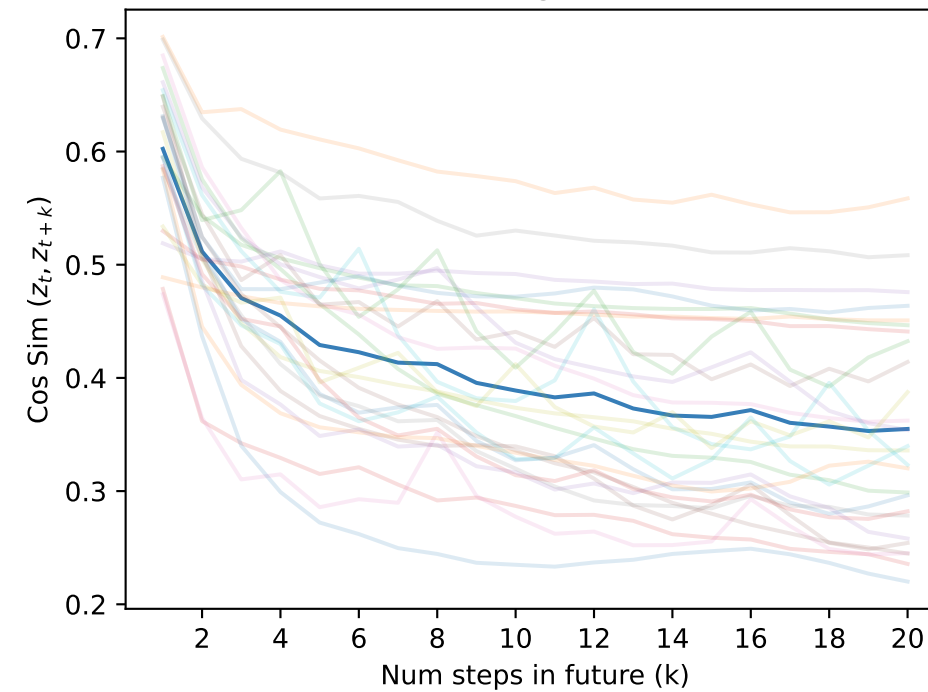

DreamerV3 RSSM with AC-CPC

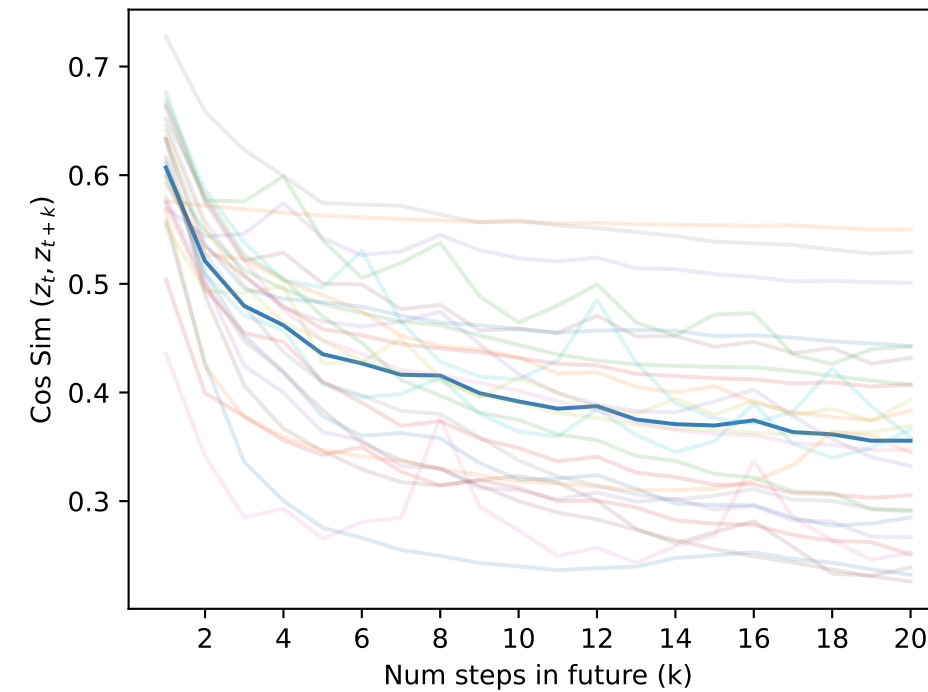

DreamerV3 RSSM w/o AC-CPC

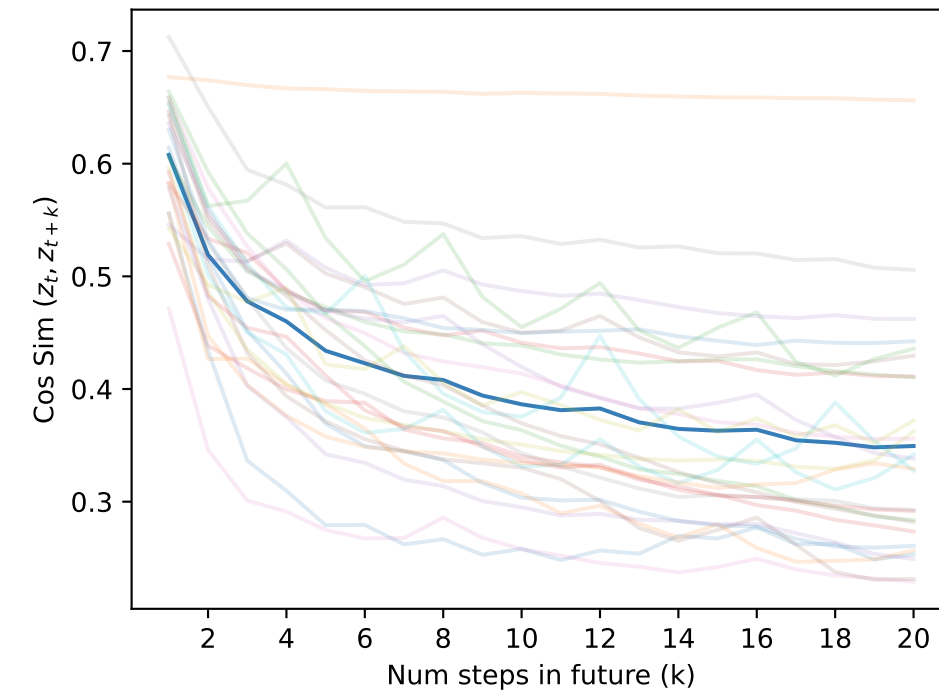

Supplement: supplementary_material [file attachment]
