# Supplementary material
Source: ML conference proceedings conference paper supplement (https://openreview.net/forum?id=YK9G4Htdew)

Mean

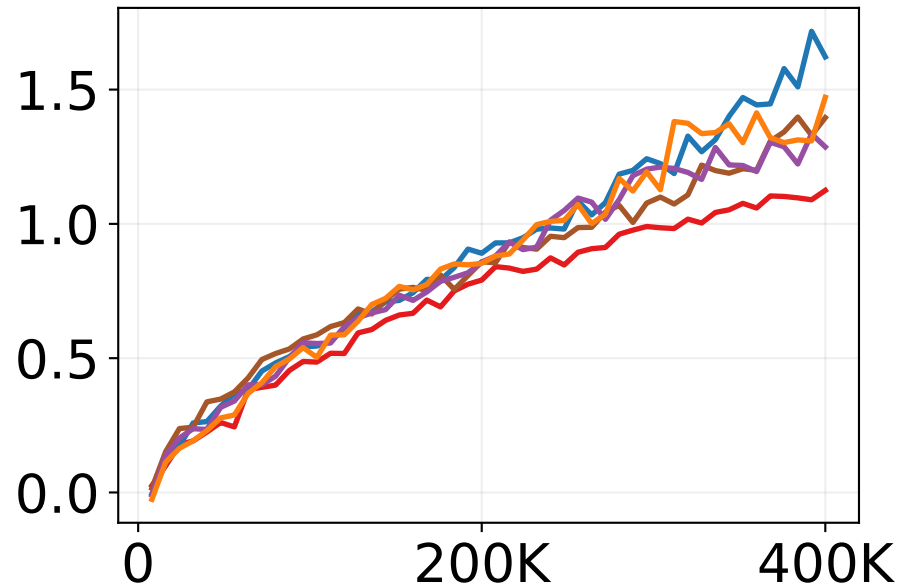

Median

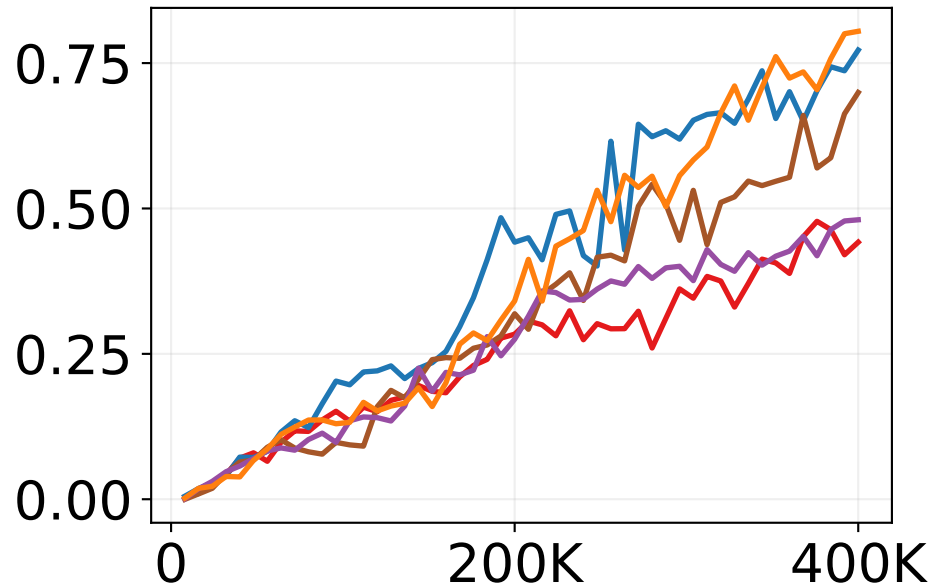

IQM

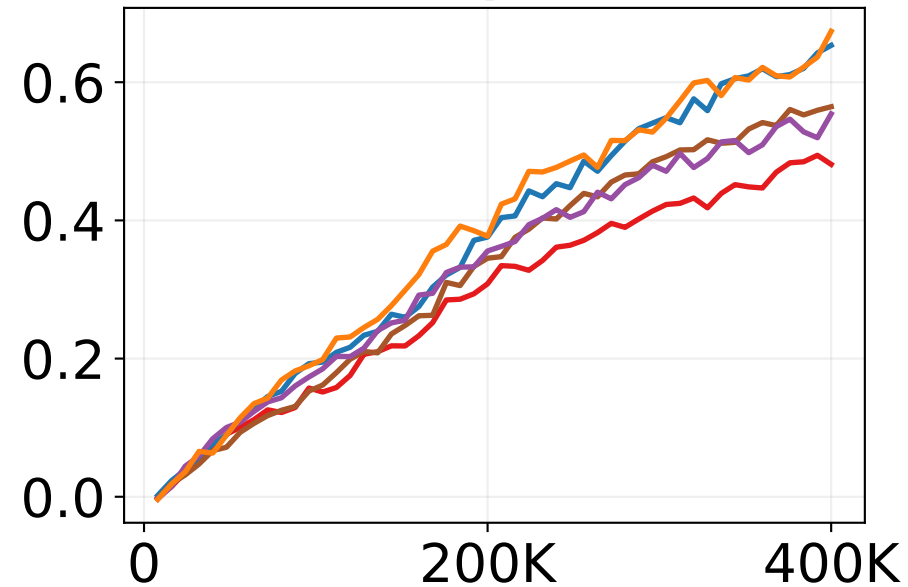

— 0 step (No AC-CPC)    — 10 steps (TWISTER)    — 1 step    — 15 steps    — 5 steps

Supplement: supplementary_material [file attachment]
